# Supplementary material
Source: MDPI journal article supplement (https://www.mdpi.com/2304-6740/9/4/25)

# checkCIF/PLATON report

Structure factors have been supplied for datablock(s) kap1150b

THIS REPORT IS FOR GUIDANCE ONLY. IF USED AS PART OF A REVIEW PROCEDURE FOR PUBLICATION, IT SHOULD NOT REPLACE THE EXPERTISE OF AN EXPERIENCED CRYSTALLOGRAPHIC REFEREE.

No syntax errors found.      CIF dictionary      Interpreting this report

## Datablock: kap1150b

---

|                        |                                        |                                  |
|------------------------|----------------------------------------|----------------------------------|
| Bond precision:        | O- B = 0.0040 A                        | Wavelength=0.71073               |
| Cell:                  | a=15.5471(19)                          | b=14.3403(17)      c=11.7315(15) |
|                        | alpha=90                               | beta=90      gamma=90            |
| Temperature:           | 301 K                                  |                                  |
|                        | Calculated                             | Reported                         |
| Volume                 | 2615.5(6)                              | 2615.5(6)                        |
| Space group            | C m c a                                | C m c a                          |
| Hall group             | -C 2bc 2                               | -C 2bc 2                         |
| Moiety formula         | B4 O56 Si16 U4, 7.104(K),<br>4.896(Na) | B K1.78 Na1.22 O14 Si4 U         |
| Sum formula            | B4 K7.10 Na4.90 O56 Si16<br>U4         | B K1.78 Na1.22 O14 Si4 U         |
| Mr                     | 2731.13                                | 682.77                           |
| Dx, g cm <sup>-3</sup> | 3.468                                  | 3.468                            |
| Z                      | 2                                      | 8                                |
| Mu (mm <sup>-1</sup> ) | 13.461                                 | 13.460                           |
| F000                   | 2497.7                                 | 2498.0                           |
| F000'                  | 2428.24                                |                                  |
| h,k,lmax               | 25,23,18                               | 25,23,18                         |
| Nref                   | 2969                                   | 2963                             |
| Tmin,Tmax              | 0.622,0.764                            | 0.114,0.164                      |
| Tmin'                  | 0.578                                  |                                  |

Correction method= # Reported T Limits: Tmin=0.114 Tmax=0.164  
AbsCorr = MULTI-SCAN

Data completeness= 0.998      Theta(max)= 35.003

R(reflections)= 0.0356( 2822)      wR2(reflections)= 0.0686( 2963)

S = 1.251      Npar= 120

---

The following ALERTS were generated. Each ALERT has the format

**test-name\_ALERT\_alert-type\_alert-level.**

Click on the hyperlinks for more details of the test.

---

### Alert level A

PLAT971\_ALERT\_2\_A Check Calcd Resid. Dens. 1.34A From O1 4.17 eA-3

**Author Response: This peak is an artefact from a unknown crystal defect. It is also located 1.82 Å from the uranium atom. The second-highest residual density peak is 2.25 eA-3, located trans to the 4.17 eA-3 peak across the U atom. These two peaks may represent oxygen atoms of uranyl group from a disordered domain in the crystal. These residual peaks appeared in refinements from multiple crystals despite extensive crystal screening. Because of their relatively small magnitudes in a uranium structure, they do not alter the good precision of the refinement from the dominant average domain.**

---

### Alert level C

PLAT077\_ALERT\_4\_C Unitcell Contains Non-integer Number of Atoms .. Please Check  
PLAT906\_ALERT\_3\_C Large K Value in the Analysis of Variance ..... 7.995 Check  
PLAT906\_ALERT\_3\_C Large K Value in the Analysis of Variance ..... 2.059 Check  
PLAT971\_ALERT\_2\_C Check Calcd Resid. Dens. 1.36A From O2 2.45 eA-3

**Author Response: This peak is an artefact from a unknown crystal defect. It is also located 1.82 Å from the uranium atom. The second-highest residual density peak is 2.25 eA-3, located trans to the 4.17 eA-3 peak across the U atom. These two peaks may represent oxygen atoms of uranyl group from a disordered domain in the crystal. These residual peaks appeared in refinements from multiple crystals despite extensive crystal screening. Because of their relatively small magnitudes in a uranium structure, they do not alter the good precision of the refinement from the dominant average domain.**

PLAT972\_ALERT\_2\_C Check Calcd Resid. Dens. 0.70A From O5 -2.07 eA-3  
PLAT972\_ALERT\_2\_C Check Calcd Resid. Dens. 1.40A From K2 -1.88 eA-3  
PLAT972\_ALERT\_2\_C Check Calcd Resid. Dens. 0.44A From K1C -1.53 eA-3  
PLAT975\_ALERT\_2\_C Check Calcd Resid. Dens. 0.67A From O2 0.74 eA-3

---

### Alert level G

CELLZ01\_ALERT\_1\_G Difference between formula and atom\_site contents detected.  
CELLZ01\_ALERT\_1\_G ALERT: check formula stoichiometry or atom site occupancies.  
From the CIF: \_cell\_formula\_units\_Z 8  
From the CIF: \_chemical\_formula\_sum B K1.78 Na1.22 O14 Si4 U  
TEST: Compare cell contents of formula and atom\_site data

| atom | Z*formula | cif sites | diff  |
|------|-----------|-----------|-------|
| B    | 8.00      | 8.00      | 0.00  |
| K    | 14.24     | 14.21     | 0.03  |
| Na   | 9.76      | 9.79      | -0.03 |
| O    | 112.00    | 112.00    | 0.00  |
| Si   | 32.00     | 32.00     | 0.00  |

|                   |                                                  |       |        |       |
|-------------------|--------------------------------------------------|-------|--------|-------|
| U                 | 8.00                                             | 8.00  | 0.00   |       |
| PLAT004_ALERT_5_G | Polymeric Structure Found with Maximum Dimension |       | 2      | Info  |
| PLAT042_ALERT_1_G | Calc. and Reported MoietyFormula Strings Differ  |       | Please | Check |
| PLAT045_ALERT_1_G | Calculated and Reported Z Differ by a Factor ... | 0.25  | Check  |       |
| PLAT068_ALERT_1_G | Reported F000 Differs from Calcd (or Missing)... |       | Please | Check |
| PLAT083_ALERT_2_G | SHELXL Second Parameter in WGHT Unusually Large  | 41.16 | Why ?  |       |
| PLAT168_ALERT_4_G | The CIF-Embedded .res File Contains EXYZ Records | 1     | Report |       |
| PLAT171_ALERT_4_G | The CIF-Embedded .res File Contains EADP Records | 2     | Report |       |
| PLAT302_ALERT_4_G | Anion/Solvent/Minor-Residue Disorder (Resd 2 )   | 100%  | Note   |       |
| PLAT302_ALERT_4_G | Anion/Solvent/Minor-Residue Disorder (Resd 3 )   | 100%  | Note   |       |
| PLAT302_ALERT_4_G | Anion/Solvent/Minor-Residue Disorder (Resd 4 )   | 100%  | Note   |       |
| PLAT302_ALERT_4_G | Anion/Solvent/Minor-Residue Disorder (Resd 5 )   | 100%  | Note   |       |
| PLAT302_ALERT_4_G | Anion/Solvent/Minor-Residue Disorder (Resd 6 )   | 100%  | Note   |       |
| PLAT395_ALERT_2_G | Deviating X-O-Y Angle From 120 for O7            | 133.5 | Degree |       |
| PLAT396_ALERT_2_G | Deviating Si-O-Si Angle From 150 for O4          | 124.6 | Degree |       |
| PLAT396_ALERT_2_G | Deviating Si-O-Si Angle From 150 for O5          | 137.2 | Degree |       |
| PLAT794_ALERT_5_G | Tentative Bond Valency for U1 (VI)               | 5.93  | Info   |       |
| PLAT860_ALERT_3_G | Number of Least-Squares Restraints .....         | 1     | Note   |       |
| PLAT912_ALERT_4_G | Missing # of FCF Reflections Above STh/L= 0.600  | 7     | Note   |       |

---

1 **ALERT level A** = Most likely a serious problem - resolve or explain  
 0 **ALERT level B** = A potentially serious problem, consider carefully  
 8 **ALERT level C** = Check. Ensure it is not caused by an omission or oversight  
 20 **ALERT level G** = General information/check it is not something unexpected

5 ALERT type 1 CIF construction/syntax error, inconsistent or missing data  
 10 ALERT type 2 Indicator that the structure model may be wrong or deficient  
 3 ALERT type 3 Indicator that the structure quality may be low  
 9 ALERT type 4 Improvement, methodology, query or suggestion  
 2 ALERT type 5 Informative message, check

---

It is advisable to attempt to resolve as many as possible of the alerts in all categories. Often the minor alerts point to easily fixed oversights, errors and omissions in your CIF or refinement strategy, so attention to these fine details can be worthwhile. In order to resolve some of the more serious problems it may be necessary to carry out additional measurements or structure refinements. However, the purpose of your study may justify the reported deviations and the more serious of these should normally be commented upon in the discussion or experimental section of a paper or in the "special\_details" fields of the CIF. checkCIF was carefully designed to identify outliers and unusual parameters, but every test has its limitations and alerts that are not important in a particular case may appear. Conversely, the absence of alerts does not guarantee there are no aspects of the results needing attention. It is up to the individual to critically assess their own results and, if necessary, seek expert advice.

### **Publication of your CIF in IUCr journals**

A basic structural check has been run on your CIF. These basic checks will be run on all CIFs submitted for publication in IUCr journals (*Acta Crystallographica*, *Journal of Applied Crystallography*, *Journal of Synchrotron Radiation*); however, if you intend to submit to *Acta Crystallographica Section C* or *E* or *IUCrData*, you should make sure that full publication checks are run on the final version of your CIF prior to submission.

### **Publication of your CIF in other journals**

Please refer to the *Notes for Authors* of the relevant journal for any special instructions relating to CIF submission.

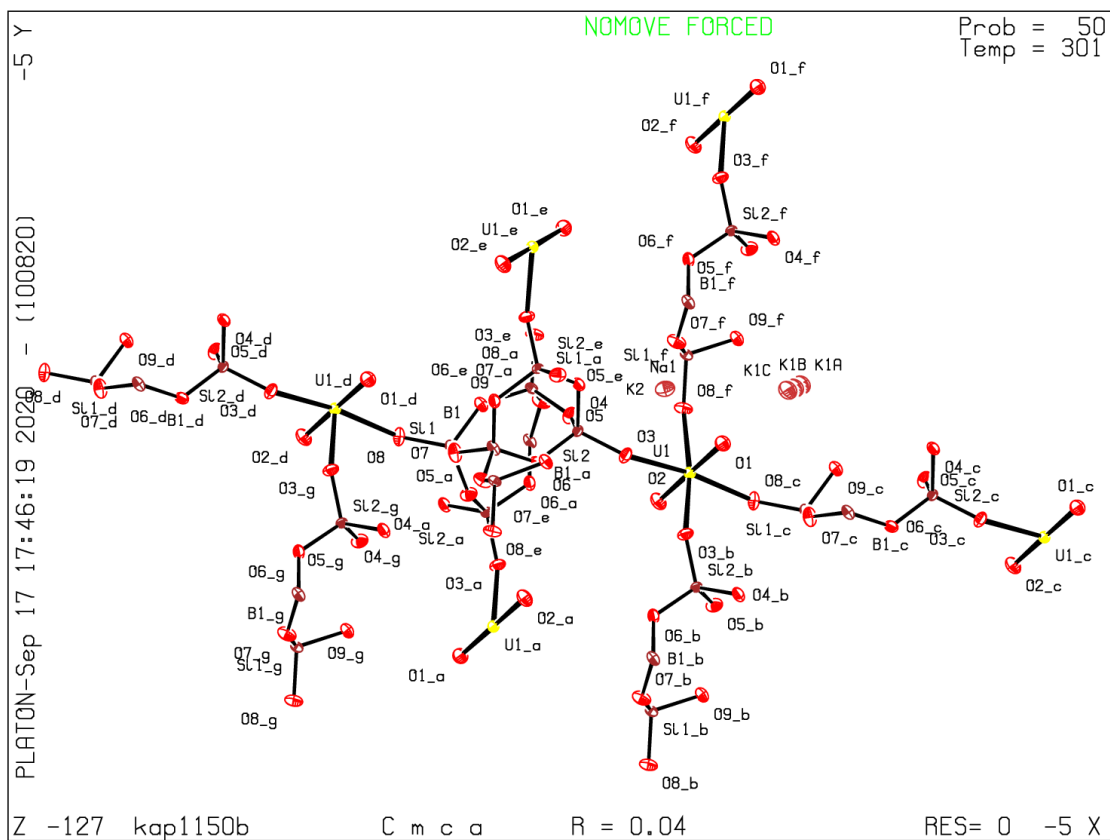

Supplement: s1 [file s1]
