# Supplementary material
Source: MDPI journal article supplement (https://www.mdpi.com/2304-6740/9/4/25)
Supplement: s1 [file s1]

# Supplementary Materila: Hydrothermal Synthesis and Structural Investigation of a Crystalline Uranyl Borosilicate

Kristen A. Pace Vladislav V. Klepov, Mark D. Smith, Travis Williams, Gregory Morrison, Jochen A. Lauterbach, Scott T. Misture and Hans-Conrad zur Loye

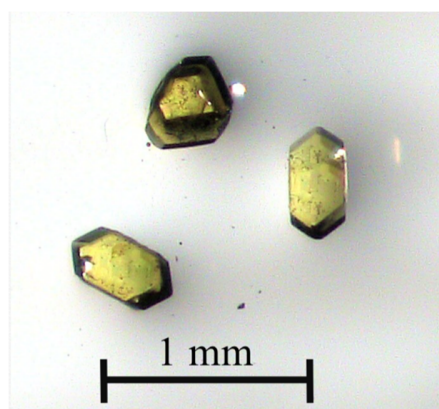

**Figure S1:** Optical image of single crystals of  $K_{1.7}Na_{1.3}[(UO_2)BSi_4O_{12}]$ .

**Table S1:**  $K_{1.70}Na_{1.30}[(UO_2)BSi_4O_{12}]$  Crystal Data and Structure Refinement

| Formula                                    | $K_{1.70}Na_{1.30}[(UO_2)BSi_4O_{12}]$ |
|--------------------------------------------|----------------------------------------|
| space group                                | <i>Cmca</i>                            |
| formula weight (g/mol)                     | 681.56                                 |
| temperature (K)                            | 300(2)                                 |
| <i>a</i> (Å)                               | 15.5159(5)                             |
| <i>b</i> (Å)                               | 14.3091(4)                             |
| <i>c</i> (Å)                               | 11.6961(4)                             |
| volume (Å <sup>3</sup> )                   | 2596.75(14)                            |
| <i>Z</i>                                   | 8                                      |
| density (g cm <sup>-3</sup> )              | 3.487                                  |
| crystal dimensions (mm <sup>3</sup> )      | 0.07 × 0.04 × 0.03                     |
| absorption coefficient (mm <sup>-1</sup> ) | 13.536                                 |
| data collection and refinement             |                                        |
| collected reflections                      | 84652                                  |
| independent reflections                    | 1671                                   |
| <i>R</i> <sub>int</sub>                    | 0.0261                                 |

|                                                  |                   |
|--------------------------------------------------|-------------------|
| refined restraints/parameters                    | 1/121             |
| goodness-of-fit on $F^2$                         | 0.972             |
| final $R$ indices [ $I > 2\sigma(I)$ ]           | $R_1 = 0.0408$    |
|                                                  | $wR_2 = 0.1071$   |
| final $R$ indices (all data)                     | $R_1 = 0.0413$    |
|                                                  | $wR_2 = 0.1077$   |
| largest diff. peak and hole ( $e/\text{\AA}^3$ ) | 10.353 and -1.056 |

Table S2: Selected Interatomic Distances for  $K_{1.8}Na_{1.2}[(UO_2)BSi_4O_{12}]$  ( $\text{\AA}$ )

|                      |          |            |            |                 |          |
|----------------------|----------|------------|------------|-----------------|----------|
| U(1)-O(1)            | 1.819(4) | Si(1)-O(5) | 1.629(3)   | Na(1)/K(2)-O(1) | 2.780(3) |
| U(1)-O(2)            | 1.813(4) | Si(1)-O(7) | 1.614(3)   | Na(1)/K(2)-O(2) | 2.622(3) |
| U(1)-O(3) $\times 2$ | 2.233(3) | Si(1)-O(8) | 1.602(3)   | Na(1)/K(2)-O(3) | 2.834(3) |
| U(1)-O(8) $\times 2$ | 2.245(3) | Si(1)-O(9) | 1.6268(16) | Na(1)/K(2)-O(4) | 2.725(3) |
|                      |          | Si(2)-O(3) | 1.587(3)   | Na(1)/K(2)-O(5) | 2.872(3) |
| B(1)-O(6) $\times 2$ | 1.469(4) | Si(2)-O(4) | 1.643(2)   | Na(1)/K(2)-O(7) | 2.590(3) |
| B(1)-O(7) $\times 2$ | 1.472(4) | Si(2)-O(5) | 1.624(3)   | Na(1)/K(2)-O(7) | 2.685(4) |
|                      |          | Si(2)-O(6) | 1.614(3)   | Na(1)/K(2)-O(8) | 2.605(3) |
|                      |          |            |            | K(2)-O(6)       | 3.083(3) |

Table S3. Selected Interatomic Distances for  $K_{1.7}Na_{1.3}[(UO_2)BSi_4O_{12}]$  ( $\text{\AA}$ )

|                      |          |            |          |                 |          |
|----------------------|----------|------------|----------|-----------------|----------|
| U(1)-O(1)            | 1.827(5) | Si(1)-O(5) | 1.628(4) | Na(1)/K(2)-O(1) | 2.773(4) |
| U(1)-O(2)            | 1.813(5) | Si(1)-O(7) | 1.611(4) | Na(1)/K(2)-O(2) | 2.626(4) |
| U(1)-O(3) $\times 2$ | 2.230(4) | Si(1)-O(8) | 1.601(4) | Na(1)/K(2)-O(3) | 2.825(4) |
| U(1)-O(8) $\times 2$ | 2.245(3) | Si(1)-O(9) | 1.625(2) | Na(1)/K(2)-O(4) | 2.715(4) |
|                      |          | Si(2)-O(3) | 1.580(4) | Na(1)/K(2)-O(5) | 2.869(4) |
| B(1)-O(6) $\times 2$ | 1.467(5) | Si(2)-O(4) | 1.639(3) | Na(1)/K(2)-O(7) | 2.574(5) |
| B(1)-O(7) $\times 2$ | 1.483(6) | Si(2)-O(5) | 1.616(4) | Na(1)/K(2)-O(7) | 2.675(6) |
|                      |          | Si(2)-O(6) | 1.611(4) | Na(1)/K(2)-O(8) | 2.584(4) |
|                      |          |            |          | K(2)-O(6)       | 3.074(4) |
